1           **Training in cortically-blind fields confers patient-specific benefit**  
2                           **against retinal thinning after occipital stroke**

3  
4 Berkeley K. Fahrenthold PhD<sup>1</sup>, Matthew R. Cavanaugh PhD<sup>1</sup>, Madhura Tamhankar MD<sup>2</sup>, Byron L.  
5 Lam MD<sup>3</sup>, Steven E. Feldon MD<sup>1</sup>, Brent A. Johnson<sup>4</sup> and Krystel R. Huxlin PhD<sup>1</sup>

6 <sup>1</sup>Flaum Eye Institute and Center for Visual Science, University of Rochester, Rochester, NY, USA.

7 <sup>2</sup>Scheie Eye Institute, University of Pennsylvania, Philadelphia, PA, USA.

8 <sup>3</sup>Bascom Palmer Eye Institute, University of Miami, Miami, FL, USA.

9 <sup>4</sup>Department of Biostatistics and Computational Biology, University of Rochester, Rochester,  
10 NY, USA

11

12 **Corresponding author:** Krystel R. Huxlin, PhD, Flaum Eye Institute, University of Rochester  
13 Medical Center, 601 Elmwood Avenue, Box 314, Rochester, NY, 14642, USA. Email:  
14 [khuxlin@ur.rochester.edu](mailto:khuxlin@ur.rochester.edu), phone: 1-585-275-5495.

15 **Total word count: 3,500 or fewer (currently ~4,000)**

16 **Funding Information:** This work was supported by NIH funding (R01 EY027314 to KRH, as well  
17 as T32 EY007125 and P30 EY001319 to the Center for Visual Science), and by an Unrestricted  
18 Grant from the Research to Prevent Blindness (RPB) Foundation to the Flaum Eye Institute. The  
19 HIS clinical trial was funded by a Center of Emerging and Innovative Science for Empire State  
20 Development (project no. [1730C004](#)), a Center of Excellence (project no. 1689bC2) and  
21 EnVision Solutions LLC. The sponsors and funding organizations had no role in the design or  
22 conduct of this research.

- 23 **Commercial Relationships Disclosures:** KRH is an inventor on US Patent No. 7,549,743. The
- 24 remaining authors have no competing interests.

25 **Abstract**

26 **Purpose:** Damage to the adult primary visual cortex (V1) causes vision loss in the contralateral  
27 hemifield, initiating a process of trans-synaptic retrograde degeneration (TRD). Here, we  
28 examined retinal correlates of TRD using a new metric to account for global changes in inner  
29 retinal thickness, and asked if perceptual training in the intact or blind field impacts its  
30 progression.

31 **Methods:** We performed a meta-analysis of optical coherence tomography (OCT) data in 48  
32 participants with unilateral V1 stroke and homonymous visual defects, who completed clinical  
33 trial NCT03350919. After measuring the thickness of the macular ganglion cell and inner  
34 plexiform layers (GCL-IPL), and the peripapillary retinal nerve fiber layer (RNFL), we computed  
35 individual laterality indices (LI) at baseline and after ~6 months of daily motion discrimination  
36 training in the intact- or blind-field. Increasingly positive LI denoted greater layer thinning in  
37 retinal regions affected *versus* unaffected by the cortical damage.

38 **Results:** Pre-training, the affected GCL-IPL and RNFL were thinner than their unaffected  
39 counterparts, generating LI values positively correlated with time since stroke. Participants  
40 trained in their intact-field exhibited increased  $LI_{GCL-IPL}$ . Those trained in their blind-field had no  
41 significant change in  $LI_{GCL-IPL}$ .  $LI_{RNFL}$  did not change in either group.

42 **Conclusions:** Relative shrinkage of the affected *versus* unaffected macular GCL-IPL can be  
43 reliably measured at an individual level and increases with time post-V1 stroke. Relative  
44 thinning progressed during intact-field training, but appeared to be halted by training within  
45 the blind field, suggesting a potentially neuroprotective effect of this simple behavioral  
46 intervention.



48 **Non-standard Abbreviations and Acronyms:**

49 CB – Cortical Blindness

50 OCT – Optical Coherence Tomography

51 LI – Laterality Index

52 dLGN – dorsal lateral geniculate nucleus

53 GCL-IPL – Ganglion Cell Layer-Inner Plexiform Layer

54 RGC – Retinal Ganglion Cell

55 HIS - Hemianopia Intervention Study

56 HVF – Humphrey Visual Field

57 OU – Oculus Uterque (both eyes)

58 OS – Oculus Sinister (left eye)

59 OD – Oculus Dexter (right eye)

60 SEM – Standard Error Mean

61 PMD – Perimetric Mean Deviation

62  $ST_{BF}$  – Mean Sensitivity of Blind Field

63 TRD – Trans-synaptic Retrograde Degeneration

64

65

## 66 Introduction

67 Cortical blindness (CB) following unilateral damage to the primary visual cortex (V1) or its  
68 immediate afferents presents as a homonymous, contra-lesional visual field defect. Although  
69 partial recovery can occur spontaneously in the first few months after damage<sup>1-4</sup>, there are no  
70 widely-accepted, validated treatments for the resulting visual defect<sup>5</sup>. Standard of care remains  
71 “no intervention”, although occasionally, patients are prescribed compensatory (e.g. saccadic)  
72 training or substitution (e.g. prism lenses) therapies<sup>6-9</sup>. Research also continues to show that  
73 visual perceptual training can partially restore vision in CB, measurable by both clinical  
74 perimetry and psychophysical tests of visual performance<sup>10-21</sup>.

75 The importance of developing some form of restorative therapy for CB is further  
76 highlighted by burgeoning evidence that once patients reach the chronic stage of >6 months  
77 post-stroke, visual field defects do not remain completely stable, as was initially thought<sup>22</sup>.  
78 Instead there appears to be progressive worsening of the perimetrically-defined blind field (BF)  
79 without intervention<sup>11,19,22,23</sup>. The most plausible explanation for such deterioration of the BF  
80 over time is TRD, which involves the progressive shrinkage and even die-back of neurons in the  
81 early visual pathways<sup>24-31</sup>. In humans, structural MRI analyses have shown that the optic tract  
82 ipsilateral to occipital cortex damage is often reduced in size<sup>25,29,30,32-35</sup>, as are the thicknesses  
83 of the ganglion cell and nerve fiber layers in corresponding regions of the retina in each eye<sup>24,28-  
84 32,34,36-45</sup>.

85 Retinal ganglion cells (RGCs) are responsible for pre-processing and ferrying visual  
86 information to the rest of the visual system. As such, their loss or dysfunction could significantly  
87 threaten the potential to recover visual functions in participants with V1 damage. Specifically,

88 retinal neurons in the therapeutically-targetable retino-geniculate-striate pathways susceptible  
89 to trans-synaptic retrograde degeneration (TRD) after occipital stroke. Isolating specific  
90 consequences of TRD in retinal regions known to synapse with V1-lesion-projecting neurons in  
91 the lateral geniculate nucleus is crucial to better understand the relationship between TRD and  
92 visual retraining. Approaches to re-train the visual deficit have been shown to confer  
93 perimetrically-computed improvements to CB visual fields<sup>16,46</sup>. However, most literature has  
94 focused on benefits to visual perception resulting from visual retraining, with limited  
95 knowledge of the effects of training on anatomical substrates of vision<sup>16,46</sup>. If visual training  
96 strengthens existing circuitry or recruits neuronal neighbors, similar to rehabilitation for motor  
97 stroke<sup>47-49</sup>, this could potentially impact retinal cells that provide input to residual visual  
98 pathways. As such, the present study asked two questions: 1) what is the extent and time-  
99 course of relative thinning in affected *versus* unaffected inner retinal layers in humans with  
100 unilateral occipital strokes, and 2) does the stimulation afforded by visual training impact the  
101 progression of inner retinal thinning in such stroke patients? To answer these questions, we  
102 performed a meta-analysis of optical coherence tomography (OCT) data collected as part of a  
103 recently-completed, multicenter, randomized, double-masked, clinical trial titled the  
104 “Hemianopia Intervention Study” (HIS; ClinicalTrials.gov identifier, NCT03350919). The HIS  
105 clinical trial design and results have been published in detail<sup>50</sup>, but in brief, the trial involved 2  
106 pre-training clinic visits to establish eligibility and measure baseline parameters, a 6-months at-  
107 home phase during which training was administered to either the intact field (IF) or BF, and 1  
108 post-training clinic visit to evaluate the effect of training. The primary outcome measure for the  
109 HIS clinical trial was change in the 24-2 Humphrey perimetric mean deviation (PMD) from

110 baseline, with significant improvements reported for people trained in their BF, and not those  
111 trained in their IF.<sup>50</sup> However, the trial also performed OCT imaging and collected  
112 measurements of GCL-IPL and RNFL thicknesses in the affected and unaffected retina of each  
113 eye in each participant at each time-point. This rich data set provided us a unique opportunity  
114 to both measure the extent of TRD in this patient cohort, and analyze the impact of two  
115 different of visual training interventions on TRD progression.

116



## 117 **Methods**

### 118 **Participants**

119 The HIS trial (NCT03350919) recruited 48 CB participants (see **Table 1** for demographics) at 3 US  
120 academic medical centers: 20 at the University of Rochester's Flaum Eye Institute, 18 at the  
121 University of Pennsylvania's Scheie Eye Institute and 8 at the University of Miami's Bascom  
122 Palmer Eye Institute. All procedures were approved by the Western Institutional Review Board  
123 (WIRB#1181904), adhered to the tenets of the Declaration of Helsinki and all participants gave  
124 written, informed consent.

125 Participants were between 21 and 75 years of age, with an MRI-confirmed occipital  
126 lesion resulting in unilateral homonymous hemianopia. Additionally, their lesions had to have  
127 occurred after the age of 18 and a minimum of 90 days prior to screening. Participants were  
128 also required to reliably fixate with both eyes during psychophysical testing and clinical  
129 Humphrey perimetry, with fixation losses, false-negative, and false-positive rates during  
130 perimetry of <20%. Participants were excluded from the study if they presented with any ocular  
131 or neurologic disease that would interfere with training. Concurrent use of any other form of  
132 visual therapy, or of medications that would affect training were additional exclusion criteria.

133

### 134 **HIS clinical trial design and training intervention**

135 As mentioned earlier, the HIS clinical trial<sup>50</sup> involved 2 pre-training clinic visits, a 6-month at-  
136 home training phase and 1 post-training clinic visit. While the primary outcome measure was  
137 change in the 24-2 Humphrey PMD from baseline to 6 months post-training, OCT data were  
138 also collected at each study visit, followed by computerized psychophysical testing focused on

139 instructing participants to correctly perform the training task. Once enrolled, participants were  
140 randomized to 2 training arms: intact field (IF) or blind field (BF) training - in a 1:1 ratio, using a  
141 permuted block design stratified by site. Participants randomized to these training groups did  
142 not differ in age (BF-trained:  $56 \pm 12$  years, range 32-72 years; IF-trained:  $61 \pm 9$  years, range 45-  
143 74 years; unpaired t-test  $p = 0.0990$ ,  $CI_{95} = -11.83$  to  $1.057$ ) or time since stroke (BF-trained:  
144  $41 \pm 82$  months, range 3-373 months; IF-trained:  $43 \pm 72$  months, range 3-338 months; unpaired  
145 t-test  $p = 0.9096$ ,  $CI_{95} = -50.37$  to  $44.98$ ).

146 The training intervention was a 2-alternative, forced-choice (2AFC), direction  
147 discrimination task using random dot stimuli presented either inside the BF or at a  
148 corresponding location in the IF (**Table 1, Supplementary Materials, Supplementary Fig. S1**).  
149 During the home training segment, two participants withdrew and their data are not included  
150 herein. The two cohorts trained for a comparable number of days (unpaired t-test  $p = 0.3598$ ,  
151  $CI_{95} = -43.82$  to  $16.27$ ; BF-trained:  $101 \pm 46$  days; IF-trained:  $115 \pm 51$  days).

152 During pre-training, in-clinic assessment, participants received instructions and  
153 underwent baseline testing with this task within their intact and blind hemifields, with fixation  
154 enforced binocularly using an Eyelink Duo Mobile eye-tracker (SR Research, Mississauga,  
155 Ontario, Canada). Training locations were selected at sites where performance first dropped to  
156 chance (50% correct) after a  $1^\circ$  lateral shift along the x-axis from the intact into the BF. Using  
157 the location where performance first drops to chance as a starting point affords proximity to  
158 intact circuitry, enhancing the possibility that training may recruit perilesional  $V1^{51}$ , and/or  
159 induce plasticity and re-integration of residual, damaged circuitry. IF-training locations were  
160 selected to be mirror-symmetric to those chosen for training in the BF. CB participants were

161 then sent home to train and were asked to perform 300 trials of the 2AFC task once daily for a  
162 minimum of 5 days per week, at their assigned, training location. Participants trained at a single  
163 location at a time, either in the IF or BF. Once performance improved sufficiently (at least 10  
164 sessions at a threshold  $<25^\circ$  with a standard deviation of less than  $5^\circ$ ), the location was moved  
165  $1^\circ$  laterally away from the vertical meridian. Participant performance as a result of these  
166 interventions has been published<sup>50</sup> and will not be repeated here in detail.

167

### 168 **Humphrey visual field testing and analysis**

169 Each participant's visual deficit was quantified through Humphrey visual field (HVF) perimetry,  
170 which was performed twice in both eyes during each study visit. The University of Rochester  
171 and the University of Pennsylvania used a Humphrey Field Analyzer II-i, and the University of  
172 Miami used a Humphrey Field Analyzer 3 (Zeiss Humphrey Systems, Atlanta, GA), with all sites  
173 using a 24-2 testing pattern. A white, size III stimulus was presented on a background with a  
174 luminance of  $11.3 \text{ cd/m}^2$  and thresholds were calculated with the Swedish Interactive Threshold  
175 Algorithm (SITA-standard). Participants' visual acuity was corrected to 20/20 for testing, and  
176 fixation was controlled using the gaze/blind spot automatic settings. The first test was excluded  
177 in both eyes to account for potential learning effects. If the second field set was not deemed  
178 reliable or could not be completed, the first set was used instead. Participants who did not have  
179 complete, reliable pre- and post-training visual fields were excluded from the present HVF  
180 analyses( $n=5$ ); an additional two participants failed to complete training and were also  
181 removed from our analysis. Two metrics were derived from HVF tests: the perimetric mean  
182 deviation (MD) and the average luminance detection sensitivity across the entire blind

183 hemifield of vision. The MD is calculated by the perimeter using an internal, weighted variance  
184 from age-defined normal population values, to estimate the amount of vision lost across the  
185 measured visual field. In the present study, sensitivity thresholds from the blind hemifield ( $ST_{BF}$ )  
186 were additionally averaged in each eye to capture deficit-specific changes. We then took the  
187 monocular MD and  $ST_{BF}$  and averaged them to generate a binocular (OU) version of each  
188 metric, for pre- and post-training comparisons, in order to compare with binocularly-computed  
189 OCT laterality indices.

190

### 191 **Optical coherence tomography (OCT) procedures and analysis**

192 Retinal OCT was performed using Cirrus HD machines (Carl Zeiss Meditech) at each study site  
193 before and after training. A  $512 \times 128$  Mac Cube scan was used to examine the ganglion cell  
194 and inner plexiform layers (GCL-IPL) around the fovea, and  $200 \times 200$  optic nerve cube scans  
195 were used to examine the retinal nerve fiber layer (RNFL). Scans were excluded if they failed to  
196 meet signal strength  $\geq 7$  in each eye.

197       OCT analyses performed as part of the HIS clinical trial<sup>50</sup> differed from those performed  
198 here in several ways. First, they involved group-level comparisons of GCL-IPL and RNFL  
199 thickness changes pre- to post-training across affected and unaffected retinal regions,  
200 separated by blind field sector and for each eye independently. Here, for the GCL-IPL, we  
201 combined the 2 nasal sectors together, and the two temporal sectors together. Furthermore,  
202 after reviewing OCT raw data, we excluded 3 HIS participants due to retinal folding or epiretinal  
203 membrane/RNFL detachment severe enough to impact layer thickness measurements. In

204 remaining participants, we then computed a laterality index (LI) to account for individual,  
205 baseline thickness variances using the following formula:

$$\textit{Laterality Index} = \frac{(\textit{Intact} - \textit{Blind})}{(\textit{Intact} + \textit{Blind})}$$

206 LI was computed for the GCL-IPL using the 2 nasal and 2 temporal sector values of both eyes,  
207 excluding superior and inferior sectors that overlapped the vertical meridian (**Fig. 1A**). The nasal  
208 and temporal macular segments of each eye corresponding to the blind or intact hemifield  
209 were then averaged together according to each participant-specific deficit. For example, a right-  
210 sided visual deficit (left-sided occipital lesion) is represented in the nasal sectors of the right eye  
211 and the temporal sectors of the left eye (see example in **Fig. 1A**).

212         Computing a laterality for the RNFL regions impacted by the deficit attempted to  
213 account for the crossed and uncrossed fibers in corresponding peripapillary sections<sup>52</sup> (**Fig. 2A**).  
214 Superior and inferior peripapillary regions comprised of uncrossed fibers, and nasal  
215 peripapillary regions comprised of crossed fibers represent intact or blind hemifields. For  
216 example, the same right-sided visual deficit area described above was represented by the  
217 superior and inferior RNFL sectors of the left eye as well as the nasal RNFL sector of the right  
218 eye (**Fig. 2A**).

219

## 220 **Statistical Analyses**

221 Paired t-tests were used to assess within-subject differences. For independent sample  
222 comparisons, unpaired t-tests were used when contrasting 2 groups. If standard deviations  
223 were not the same in each group, Welch's correction was used. Linear regressions were used to

224 model the relationship between explanatory variables and dependent outcomes, with  $r$  values  
225 and 95% confidence intervals ( $CI_{95}$ ) for  $\rho$  provided, and significance estimated using a t-test.  
226

## 227 **Results**

### 228 **Baseline retinal layer thicknesses – effects of time since stroke**

229 Prior to intervention, GCL-IPL thicknesses corresponding to the blind or intact hemifields were  
230 significantly different from each other, with the affected hemiretina's GCL-IPL being thinner  
231 than the unaffected hemiretina's (**Fig.1B**). We then computed LI to factor out possible global  
232 retinal phenomena (e.g., aging-related, metabolic, etc.) in order to better isolate lesion-specific  
233 degeneration in retinal regions corresponding to perimetrically-defined visual deficits. The  $LI_{GCL-IPL}$   
234 was positive, averaging  $0.056 \pm 0.06$ , with a range of -0.068 to 0.29. An LI of 0 would indicate  
235 no relative thinning of the lesion-projecting compared to the non-lesion projecting part of the  
236 retina, while positive LI values denote thinning in retinal areas representing the blind hemifield  
237 relative to those representing the intact hemifield. Importantly, the  $LI_{GCL-IPL}$  was positively  
238 correlated with time since stroke (**Fig. 1C**), with greater thinning of the affected hemiretina  
239 GCL-IPL in participants imaged beyond 12 months post-stroke compared to those imaged prior  
240 to this timepoint (**Fig. S2A**).

241 A similar pattern of results was obtained for the peripapillary RNFL, which was thinner  
242 for segments carrying RGC axons representing the visual field defect compared to those  
243 carrying predominantly intact field fibers (**Fig.2B**). As a result,  $LI_{RNFL}$  averaged  $0.019 \pm 0.04$ ,  
244 ranging from -0.10 to 0.11. Moreover, just like  $LI_{GCL-IPL}$ ,  $LI_{RNFL}$  was positively correlated with time  
245 since stroke (**Fig. 2C**), with relative thinning most pronounced beyond 12 months post-lesion  
246 (**Fig. S2B**). Overall, these data show clear GCL-IPL and RNFL thinning in regions of the retina  
247 carrying either RGC somata, dendrites and/or axons representing blind regions of the visual

248 field. They also show greater thinning at later than earlier timepoints, especially >12 months  
249 after occipital stroke.

250

### 251 **Effect of visual training on GC complex thickness**

252 We next asked whether visual training altered signs of TRD at the level of the retina. Here, we  
253 analyzed CB patients who completed 6 months of visual training as part of the HIS clinical  
254 trial<sup>50</sup>. As previously reported, global direction discrimination training in the perimetrically-  
255 defined BF of CB patients elicits improvements not only on the trained task, but also on  
256 binocular (OU) Humphrey perimetry<sup>11,50</sup>. Consistent with this observation, participants trained  
257 in their BF exhibited a systematic improvement in OU MD (**Fig. 3A**). To ascertain if the change in  
258 MD was driven by the blind hemifield (*versus* improved ability to perform Humphrey perimetry  
259 across the entire test area), we also computed OU ST<sub>BF</sub> change for the blind hemifield. OU ST<sub>BF</sub>  
260 improved significantly following BF training (**Fig. 3B**), contrasting with a lack of significant  
261 changes - for both OU MD and ST<sub>BF</sub> - in the IF-trained cohort (**Fig. 3D, E**). Notably, a strong  
262 correlation exists between MD and ST<sub>BF</sub> in both cohorts, pre- and post-training (**Fig. 3C, F**).

263 Having established a subtle but differential effect of training on perimetry between the  
264 two cohorts, we then asked if - and to what degree - the two types of intervention impacted  
265 retinal thinning. For LI<sub>GCL-IPL</sub>, there was a significant overall increase pre- to post-training across  
266 all participants (**Fig. 4A**). However, no detectable changes occurred pre- to post-training overall  
267 in LI<sub>RNFL</sub> (**Fig. 4B**). Separating the two interventions, LI<sub>GCL-IPL</sub> was significantly larger post-training  
268 in those who trained in their intact field (**Fig. 5A**), but not in BF-trained participants (**Fig. 5B**).  
269 Furthermore, in the IF training group, raw GCL-IPL thicknesses were significantly lower in the



270 post-training affected hemiretina (**Fig. 5C**). Post-training affected GCL-IPL thicknesses also  
271 significantly changed from pre-training in the BF training group (**Fig. 5D**). Additionally, a  
272 significant difference in magnitude of change in the affected relative to unaffected hemiretinas  
273 was present in IF trained participants and, critically, no such difference was found in BF trained  
274 participants (**Fig. 5E**). However, we fail to reject the null hypothesis that the pre-post  
275 differences of the affected hemiretinas differ by training type (**Fig. 5E**).

276         When assessing the impact of training on the RNFL, no significant change in  $Ll_{RNFL}$  was  
277 found in either group pre- to post-training (**Fig. 6A, B**). Similarly, no significant pre-post training  
278 differences were observed in either training cohort for raw RNFL thickness (**Fig. 6C, D**).  
279 Additionally, when assessing pre-post change, no significant differences were seen between or  
280 within training groups (**Fig. 6E**).

281         Consistent with these findings, changes in  $ST_{BF}$  and  $Ll_{GCL-IPL}$  were directly [and inversely]  
282 correlated in those trained in their blind hemifield (**Fig. 7A**), but not in those trained in their IF  
283 (**Fig. 7B**). No significant correlations were observed between changes in  $ST_{BF}$  and  $Ll_{RNFL}$  in either  
284 training cohort (**Fig. 7C, D**).

285

286

## 287 **Discussion**

288 The present study asked – for the first time – whether visual stimulation provided by perceptual  
289 training alters the progression of retinal ganglion cell layer complex thinning after stroke  
290 damage to the occipital cortex in adult humans. First, we confirmed prior reports of relative  
291 thinning in the affected *versus* unaffected retinas’ GCL-IPL and RNFL after unilateral V1  
292 damage<sup>28,29,31,32,34,36,39,41,53</sup> using non-invasive OCT imaging. Second, the spread of post-stroke  
293 times at participant enrollment allowed us to define a time-course for this thinning. Finally, we  
294 now provide evidence that a simple behavioral intervention slows or blocks the progression of  
295 relative GCL-IPL thinning whereas comparable stimulation of the intact hemifield of vision fails  
296 to do so.

297

### 298 **Occipital damage causes variable, progressive shrinkage of the GC complex**

299 Our observations showed that the largest, positive deviations from 0 in  $LI_{GCL-IPL}$  and  $LI_{RNFL}$   
300 occurred beyond 12 months post-stroke. While some deviation in  $LI_{GCL-IPL}$  (but not  $LI_{RNFL}$ ) was  
301 also observed in our earliest participants, there was considerable inter-individual variability  
302 which precluded a significance analysis in the present cohort. Large deviations of LI values from  
303 0 were previously observed for optic tract volumes using structural magnetic resonance  
304 imaging, starting from ~6 months post stroke, albeit also with large inter-individual variability<sup>35</sup>.  
305 This time-course differential makes some sense if one considers that the optic tract contains  
306 the distal portions of RGC axons, right before they synapse in the dorsal lateral geniculate  
307 nucleus. These distal axons, being closer to the V1 lesion site, might exhibit earlier signs of  
308 target loss and degeneration than the cell bodies and dendritic arbors of the parent cells in the

309 retina, but once again, a larger sample size earlier post-stroke would be needed to make this  
310 determination from a statistically-valid standpoint.

311 As stated earlier, a positive LI reflects a relative thinning of the lesion-projecting vs.  
312 intact-hemisphere-projecting portions of the macular GCL-IPL. This relative thinning could be  
313 attributable to shrinking of the RGC soma, cell death, and/or changes in cell branching;  
314 similarly, relative thinning in the RNFL could result from RGC axonal loss or shrinkage or  
315 both<sup>24,28,29,32,34,37,40,53-55</sup>. Though past studies show that RGCs are ultimately lost over time after  
316 occipital damage<sup>28,29,31,55,56</sup>, there is also evidence that RGCs change size based on metabolic  
317 activity or the beginning stages of apoptosis<sup>57,58</sup>. As such, slowing or even reversing retinal  
318 thinning may be possible if intervention occurs prior to significant cell death.

319 Importantly, both the GCL-IPL and RNFL were previously reported to thin with increasing  
320 age in humans<sup>59</sup>, a fact confirmed in the present data set, and is likely related to cell loss and/or  
321 shrinkage (**Fig. S3**). However, it is important to note that by computing and tracking changes in  
322 LI rather than raw layer thicknesses, we were able to dissociate the impact of the occipital  
323 stroke and subsequent training interventions, from this natural trend.

324

### 325 **Visual training blocks the progression of *relative* GC complex thinning**

326 In spite of initial retinal ganglion cell complex thinning at baseline, participants who trained in  
327 their BF for 6 months showed improvements in binocular performance metrics derived from  
328 Humphrey perimetry and seemed to avoid the increase in  $LI_{GCL-IPL}$  that occurred in participants  
329 randomized to train in their IF. While GCL-IPL thickness decreased in both groups, the change in  
330 GCL-IPL thickness of the affected relative to the unaffected hemiretina was only significant in

331 the IF-trained participants. Coupled with a failure to reject the null hypothesis in pre- to post-  
332 training differences of  $LI_{GCL-IPL}$  in the BF-trained group, this suggests a subtle but significant  
333 effect of training location on GCL-IPL thinning within a given patient, which is lost when  
334 comparing effects across individuals. The inherent variability in OCT layer thickness in small  
335 cohorts makes it difficult to compare groups directly. This is further complicated by variability  
336 introduced due to time-dependent TRD. In the future, increasing the sample size to increase  
337 sensitivity is crucial to better understanding the anatomical underpinnings of visual retraining.  
338 This is a difficult endeavor with two critical limitations 1) CB participants with lesions limited to  
339 the occipital cortex are rare and challenging to recruit and 2) once recruited, CB participants  
340 require time-intensive testing and evaluation. Alleviating these limitations would require  
341 expansion of collaborating facilities and personnel, as well as relaxing inclusion and exclusion  
342 recruitment criteria, leading to a more heterogenous patient population. However, despite  
343 current limitations these within-group comparisons provide novel insights into training-  
344 dependent changes within the early visual pathway.

345         These surprising observations suggest first that OCT imaging and our derived LI metric is  
346 a sensitive biomarker for assessing the impact of training in post-stroke CB patients. Just as  
347 importantly, it also suggests that an intervention which locally stimulates RGCs in a retinal area  
348 deprived of several key central targets may benefit the structural integrity of these residual  
349 cells. In turn, this may increase the likelihood that these neurons are retained long-term in the  
350 residual visual circuitry, perhaps providing the neural substrates of training-induced recovery of  
351 visual functions seen deeper into the visual deficit<sup>51</sup>. Conversely, training within the intact field  
352 locally stimulates circuits that are not directly affected by V1 damage-mediated TRD<sup>26,29,43</sup>.

353 Though V1 areas of both hemispheres representing visual information along the vertical  
354 meridian are connected via callosal axonal projections<sup>60</sup>, notable due to the training locations  
355 of these participants, these interhemispheric connections do not appear to provide enough  
356 benefit to anterior portion of the visual pathway to be observable at the level of the retina.

357 So, what could underlie the stabilization of  $L_{GCL-IPL}$  in BF-trained participants? As  
358 mentioned earlier, damaged RGCs undergo changes in their dendritic arbors in the IPL<sup>61,62</sup> and  
359 in supporting cells, such as muller glia<sup>57,58,63</sup>, which span the entire thickness of the retina.  
360 Training in the BF could increase the energy demands of stimulated RGCs, and by consequence,  
361 of surrounding supporting cells, in turn causing structural changes manifested as a cell-size  
362 increase and/or shrinkage prevention<sup>36,57</sup>. Changes in surviving RGCs are of course likely  
363 occurring in tandem with RGC loss due to retrograde degeneration – a phenomenon on which  
364 visual training's effects are unknown.

365 An important question emerging from the present results is whether the stabilization of  
366 the  $L_{GCL-IPL}$  persists after BF training stops. If this phenomenon relies on increased retinal  
367 activity due to training, it is possible that physiological mechanisms of TRD will eventually  
368 overcome the benefits gained once training ceases. However, it is also possible that if  
369 participants incorporate their regained visual abilities into everyday usage, they could maintain  
370 them and sustain their associated circuits.

371 Finally, we saw no significant changes in  $L_{RNFL}$  or RNFL thickness in either training  
372 cohort, although several factors likely limited our ability to detect such changes with OCT,  
373 including the anatomical complexities of the RNFL in different peripapillary zones, the very  
374 small volume of the RNFL overall, our relatively small sample size and inter-subject variability.

375 Future studies using larger sample sizes, more detailed analyses and better imaging resolution  
376 will be required to rigorously elucidate the impact of training on the RNFL.

377

### 378 **Conclusion**

379 In conclusion, the present work investigated the impact of a visual training intervention  
380 administered either inside the blind or intact field of occipital stroke patients on the  
381 progression of TRD at the level of the inner retina. We found that relative thinning in the GCL-  
382 IPL and RNFL mirrored a distinct time-course post-stroke previously reported in the literature.  
383 Training for ~6 months with a motion discrimination task inside the blind hemifield appeared to  
384 block the progression of relative thinning in the ganglion cell complex. In contrast, this relative  
385 thinning proceeded unabated when training was administered to the intact field of vision. Our  
386 results provide the first evidence of a greater structural benefit in the retina for a behavioral  
387 intervention that stimulates circuitry impacted by V1 damage, over one that stimulates the  
388 intact circuitry.

389

390

391

392    **Disclosures:** Berkeley K. Fahrenthold, None; Matthew R. Cavanaugh, None; Madhura  
393            Tamhankar, None; Byron L. Lam, None; Steven E. Feldon, None; Brent A. Johnson, None;  
394            Krystal R. Huxlin, inventor on US Patent No. 7,549,743 (P)  
395

## 396 References

- 397 1. Gray CS, French JM, Bates D, Cartlidge NE, Venables GS, James OF. Recovery of visual fields  
398 in acute stroke: homonymous hemianopia associated with adverse prognosis. *Age Ageing*.  
399 1989;18:419–421.
- 400 2. Lin S, George BZ, Wilson-Holt NJ. Perimetric demonstration of spontaneous visual field  
401 recovery following occipital lobe haemorrhage. *BMJ Case Rep*. 2013;2013.
- 402 3. Zhang X, Kedar S, Lynn MJ, Newman NJ, Biousse V. Homonymous Hemianopia in Stroke. *J*.  
403 *Neuroophthalmol*. 2006;26:180.
- 404 4. Zhang X, Kedar S, Lynn MJ, Newman NJ, Biousse V. Natural history of homonymous  
405 hemianopia. *Neurology*. 2006;66:901–905.
- 406 5. Perez C, Chokron S. Rehabilitation of homonymous hemianopia: insight into blindsight.  
407 *Front. Integr. Neurosci*. 2014;8.
- 408 6. Peli E. Field expansion for homonymous hemianopia by optically induced peripheral  
409 exotropia. *Optom. Vis. Sci*. 2000;77:453–464.
- 410 7. Sahraie A, Smania N, Zihl J. Use of NeuroEyeCoach™ to Improve Eye Movement Efficacy in  
411 Patients with Homonymous Visual Field Loss. *BioMed Res. Int*. 2016;2016:5186461.
- 412 8. Weinberg J, Diller L, Gordon WA, Gerstman LJ, Lieberman A, Lakin P, Hodges G, Ezrachi O.  
413 Visual scanning training effect on reading-related tasks in acquired right brain damage.  
414 *Arch. Phys. Med. Rehabil*. 1977;58:479–486.
- 415 9. Pollock A, Hazelton C, Rowe FJ, Jonuscheit S, Kernohan A, Angilley J, Henderson CA,  
416 Langhorne P, Campbell P. Interventions for visual field defects in people with stroke.  
417 *Cochrane Database Syst. Rev*. 2019;5:CD008388.
- 418 10. Bergsma DP, Elshout JA, van den Berg AV. Segregation of Spontaneous and Training Induced  
419 Recovery from Visual Field Defects in Subacute Stroke Patients. *Front. Neurol*. 2017;8:681.
- 420 11. Cavanaugh MR, Huxlin KR. Visual discrimination training improves Humphrey perimetry in  
421 chronic cortically induced blindness. *Neurology*. 2017;88:1856–1864.
- 422 12. Cavanaugh MR, Zhang R, Melnick MD, Das A, Roberts M, Tadin D, Carrasco M, Huxlin KR.  
423 Visual recovery in cortical blindness is limited by high internal noise. *J. Vis*. 2015;15:9.
- 424 13. Chokron S, Perez C, Obadia M, Gaudry I, Laloum L, Gout O. From blindsight to sight:  
425 cognitive rehabilitation of visual field defects. *Restor. Neurol. Neurosci*. 2008;26:305–320.
- 426 14. Das A, Tadin D, Huxlin KR. Beyond blindsight: properties of visual relearning in cortically  
427 blind fields. *J. Neurosci*. 2014;34:11652–11664.



- 428 15. Huxlin KR, Martin T, Kelly K, Riley M, Friedman DI, Burgin WS, Hayhoe M. Perceptual  
429 relearning of complex visual motion after V1 damage in humans. *J. Neurosci.*  
430 2009;29:3981–3991.
- 431 16. Melnick MD, Tadin D, Huxlin KR. Relearning to See in Cortical Blindness. *Neuroscientist.*  
432 2016;22:199–212.
- 433 17. Raninen A, Vanni S, Hyvärinen L, Näsänen R. Temporal sensitivity in a hemianopic visual  
434 field can be improved by long-term training using flicker stimulation. *J. Neurol. Neurosurg.*  
435 *Psychiatry.* 2007;78:66–73.
- 436 18. Sahraie A, Macleod M-J, Trevethan CT, Robson SE, Olson JA, Callaghan P, Yip B. Improved  
437 detection following Neuro-Eye Therapy in patients with post-geniculate brain damage.  
438 *Exp. Brain Res.* 2010;206:25–34.
- 439 19. Saionz EL, Tadin D, Melnick MD, Huxlin KR. Functional preservation and enhanced capacity  
440 for visual restoration in subacute occipital stroke. *Brain.* 2020;143:1857–1872.
- 441 20. Trevethan CT, Urquhart J, Ward R, Gentleman D, Sahraie A. Evidence for perceptual  
442 learning with repeated stimulation after partial and total cortical blindness. *Adv. Cogn.*  
443 *Psychol.* 2012;8:29–37.
- 444 21. Vaina LM, Soloviev S, Calabro FJ, Buonanno F, Passingham R, Cowey A. Reorganization of  
445 retinotopic maps after occipital lobe infarction. *J. Cogn. Neurosci.* 2014;26:1266–1282.
- 446 22. Wang V, Saionz E, Cavanaugh M, Huxlin K. Natural progression of perimetric visual field  
447 defects after V1 stroke. *J. Vis.* 2017;17:51–52.
- 448 23. Saionz EL, Cavanaugh MR, Johnson BA, Harrington D, Aguirre GK, Huxlin KR. The natural  
449 history of homonymous hemianopia revisited [Internet]. 2022 [cited 2023 Feb  
450 16];2022.10.06.22280668. Available from:  
451 <https://www.medrxiv.org/content/10.1101/2022.10.06.22280668v1>
- 452 24. Beatty R, Sadun A, Smith L, Vonsattel J, Richardson E. Direct demonstration of transsynaptic  
453 degeneration in the human visual system: a comparison of retrograde and anterograde  
454 changes. *J. Neurol. Neurosurg. Psychiatry.* 1982;45:143–146.
- 455 25. Bridge H, Jindahra P, Barbur J, Plant GT. Imaging Reveals Optic Tract Degeneration in  
456 Hemianopia. *Invest. Ophthalmol. Vis. Sci.* 2011;52:382–388.
- 457 26. Cowey A, Stoerig P, Perry VH. Transneuronal retrograde degeneration of retinal ganglion  
458 cells after damage to striate cortex in macaque monkeys: selective loss of P beta cells.  
459 *Neuroscience.* 1989;29:65–80.
- 460 27. Cowey A, Alexander I, Stoerig P. Transneuronal retrograde degeneration of retinal ganglion  
461 cells and optic tract in hemianopic monkeys and humans. *Brain.* 2011;134:2149–2157.

- 462 28. Herro A, Lam B. Retrograde degeneration of retinal ganglion cells in homonymous  
463 hemianopsia. *Clin. Ophthalmol.* 2015;1057.
- 464 29. Jindahra P, Petrie A, Plant GT. Retrograde trans-synaptic retinal ganglion cell loss identified  
465 by optical coherence tomography. *Brain.* 2009;132:628–634.
- 466 30. Jindahra P, Petrie A, Plant GT. The time course of retrograde trans-synaptic degeneration  
467 following occipital lobe damage in humans. *Brain.* 2012;135:534–541.
- 468 31. Park H-YL, Park YG, Cho A-H, Park CK. Transneuronal Retrograde Degeneration of the  
469 Retinal Ganglion Cells in Patients with Cerebral Infarction. *Ophthalmology.*  
470 2013;120:1292–1299.
- 471 32. Meier PG, Maeder P, Kardon RH, Borruat F-X. Homonymous Ganglion Cell Layer Thinning  
472 After Isolated Occipital Lesion: Macular OCT Demonstrates Transsynaptic Retrograde  
473 Retinal Degeneration. *J. Neuroophthalmol.* 2014;1.
- 474 33. Millington RS, Yasuda CL, Jindahra P, Jenkinson M, Barbur JL, Kennard C, Cendes F, Plant GT,  
475 Bridge H. Quantifying the pattern of optic tract degeneration in human hemianopia. *J.*  
476 *Neurol. Neurosurg. Psychiatry.* 2014;85:379–386.
- 477 34. Yamashita T, Miki A, Goto K, Araki S, Takizawa G, Ieki Y, Kiryu J, Tabuchi A, Iguchi Y, Kimura  
478 K, et al. Retinal Ganglion Cell Atrophy in Homonymous Hemianopia due to Acquired  
479 Occipital Lesions Observed Using Cirrus High-Definition-OCT. *J. Ophthalmol.* 2016;2016:1–  
480 9.
- 481 35. Fahrenthold BK, Cavanaugh MR, Jang S, Murphy AJ, Ajina S, Bridge H, Huxlin KR. Optic Tract  
482 Shrinkage Limits Visual Restoration After Occipital Stroke. *Stroke.* 2021;52:3642–3650.
- 483 36. Schneider CL, Prentiss EK, Busza A, Matmati K, Matmati N, Williams ZR, Sahin B, Mahon BZ.  
484 Survival of retinal ganglion cells after damage to the occipital lobe in humans is activity  
485 dependent. *Proc R Soc B Biol Sci.* 2019;286:9.
- 486 37. Goto K, Miki A, Yamashita T, Araki S, Takizawa G, Nakagawa M, Ieki Y, Kiryu J. Sectoral  
487 analysis of the retinal nerve fiber layer thinning and its association with visual field loss in  
488 homonymous hemianopia caused by post-geniculate lesions using spectral-domain optical  
489 coherence tomography. *Graefes Arch. Clin. Exp. Ophthalmol.* 2016;254:745–756.
- 490 38. Keller J, Sánchez-Dalmau BF, Villoslada P. Lesions in the Posterior Visual Pathway Promote  
491 Trans-Synaptic Degeneration of Retinal Ganglion Cells. *PLoS ONE.* 2014;9:e97444.
- 492 39. Mehta JS, Plant GT. Optical Coherence Tomography (OCT) Findings in Congenital/Long-  
493 Standing Homonymous Hemianopia. *Am. J. Ophthalmol.* 2005;140:727–729.

- 494 40. Mitchell JR, Oliveira C, Tsiouris AJ, Dinkin MJ. Corresponding Ganglion Cell Atrophy in  
495 Patients With Postgeniculate Homonymous Visual Field Loss: *J. Neuroophthalmol.*  
496 2015;35:353–359.
- 497 41. Porrello G, Falsini B. Retinal ganglion cell dysfunction in humans following post-geniculate  
498 lesions: specific spatio-temporal losses revealed by pattern ERG. *Vision Res.*  
499 1999;39:1739–1748.
- 500 42. Shin H-Y, Park H-YL, Choi J-A, Park CK. Macular ganglion cell-inner plexiform layer thinning  
501 in patients with visual field defect that respects the vertical meridian. *Graefes Arch. Clin.*  
502 *Exp. Ophthalmol.* 2014;252:1501–1507.
- 503 43. Simmen CF, Fierz FC, Michels L, Aldusary N, Landau K, Piccirelli M, Traber GL. Lateral  
504 Geniculate Nucleus Volume Determined on MRI Correlates With Corresponding Ganglion  
505 Cell Layer Loss in Acquired Human Postgeniculate Lesions. *Invest. Ophthalmol. Vis. Sci.*  
506 2022;63:18.
- 507 44. Yamashita T, Miki A, Goto K, Araki S, Takizawa G, Ieki Y, Kiryu J, Tabuchi A, Iguchi Y, Kimura  
508 K, et al. Evaluation of Significance Maps and the Analysis of the Longitudinal Time Course  
509 of the Macular Ganglion Cell Complex Thicknesses in Acquired Occipital Homonymous  
510 Hemianopia Using Spectral-domain Optical Coherence Tomography. *Neuro-Ophthalmol.*  
511 44:236–245.
- 512 45. Zangerl B, Whatham A, Kim J, Choi A, Assaad NN, Hennessy MP, Kalloniatis M. Reconciling  
513 visual field defects and retinal nerve fibre layer asymmetric patterns in retrograde  
514 degeneration: an extended case series: Retinal nerve fibre layer defects in retrograde  
515 degeneration. *Clin. Exp. Optom.* 2017;100:214–226.
- 516 46. Saionz EL, Busza A, Huxlin KR. Chapter 25 - Rehabilitation of visual perception in cortical  
517 blindness [Internet]. In: Quartarone A, Ghilardi MF, Boller F, editors. Handbook of Clinical  
518 Neurology. Elsevier; 2022 [cited 2023 Nov 15]. p. 357–373. Available from:  
519 <https://www.sciencedirect.com/science/article/pii/B9780128194102000308>
- 520 47. Brown CE, Aminoltejari K, Erb H, Winship IR, Murphy TH. In Vivo Voltage-Sensitive Dye  
521 Imaging in Adult Mice Reveals That Somatosensory Maps Lost to Stroke Are Replaced over  
522 Weeks by New Structural and Functional Circuits with Prolonged Modes of Activation  
523 within Both the Peri-Infarct Zone and Distant Sites. *J. Neurosci.* 2009;29:1719–1734.
- 524 48. Brown CE, Li P, Boyd JD, Delaney KR, Murphy TH. Extensive Turnover of Dendritic Spines  
525 and Vascular Remodeling in Cortical Tissues Recovering from Stroke. *J. Neurosci.*  
526 2007;27:4101–4109.
- 527 49. Harrison TC, Silasi G, Boyd JD, Murphy TH. Displacement of Sensory Maps and  
528 Disorganization of Motor Cortex After Targeted Stroke in Mice. *Stroke.* 2013;44:2300–  
529 2306.

- 530 50. Cavanaugh MR, Blanchard LM, McDermott M, Lam BL, Tamhankar M, Feldon SE. Efficacy of  
531 Visual Retraining in the Hemianopic Field after Stroke: Results of a Randomized Clinical  
532 Trial. *Ophthalmology*. 2021;128:1091–1101.
- 533 51. Barbot A, Das A, Melnick MD, Cavanaugh MR, Merriam EP, Heeger DJ, Huxlin KR. Spared  
534 perilesional V1 activity underlies training-induced recovery of luminance detection  
535 sensitivity in cortically-blind patients. *Nat. Commun*. 2021;12:6102.
- 536 52. Jansonius NM, Schiefer J, Nevalainen J, Paetzold J, Schiefer U. A mathematical model for  
537 describing the retinal nerve fiber bundle trajectories in the human eye: Average course,  
538 variability, and influence of refraction, optic disc size and optic disc position. *Exp. Eye Res*.  
539 2012;105:70–78.
- 540 53. Cowey A, Alexander I, Stoerig P. Transneuronal retrograde degeneration of retinal ganglion  
541 cells and optic tract in hemianopic monkeys and humans. *Brain*. 2011;134:2149–2157.
- 542 54. Cowey A. Atrophy of Retinal Ganglion Cells after Removal of Striate Cortex in a Rhesus  
543 Monkey. *Perception*. 1974;3:257–260.
- 544 55. Johnson H, Cowey A. Transneuronal retrograde degeneration of retinal ganglion cells  
545 following restricted lesions of striate cortex in the monkey. *Exp. Brain Res*. 2000;132:269–  
546 275.
- 547 56. Buren JMV. Trans-synaptic retrograde degeneration in the visual system of primates. *J*.  
548 *Neurol. Neurosurg. Psychiatry*. 1963;26:402–409.
- 549 57. Davis BM, Guo L, Ravindran N, Shamsheer E, Baekelandt V, Mitchell H, Bharath AA, De Groef  
550 L, Cordeiro MF. Dynamic changes in cell size and corresponding cell fate after optic nerve  
551 injury. *Sci. Rep*. 2020;10:21683.
- 552 58. Miettinen TP, Björklund M. Mitochondrial Function and Cell Size: An Allometric  
553 Relationship. *Trends Cell Biol*. 2017;27:393–402.
- 554 59. Zhang X, Francis BA, Dastiridou A, Chopra V, Tan O, Varma R, Greenfield DS, Schuman JS,  
555 Huang D. Longitudinal and Cross-Sectional Analyses of Age Effects on Retinal Nerve Fiber  
556 Layer and Ganglion Cell Complex Thickness by Fourier-Domain OCT. *Transl. Vis. Sci*.  
557 *Technol*. 2016;5:1.
- 558 60. Saenz M, Fine I. Topographic Organization of V1 Projections through the Corpus Callosum in  
559 Humans. *NeuroImage*. 2010;52:1224–1229.
- 560 61. El-Danaf RN, Huberman AD. Characteristic Patterns of Dendritic Remodeling in Early-Stage  
561 Glaucoma: Evidence from Genetically Identified Retinal Ganglion Cell Types. *J. Neurosci*.  
562 2015;35:2329–2343.

563 62. Amato R, Catalani E, Dal Monte M, Cammalleri M, Cervia D, Casini G. Morpho-functional  
564 analysis of the early changes induced in retinal ganglion cells by the onset of diabetic  
565 retinopathy: The effects of a neuroprotective strategy. *Pharmacol. Res.* 2022;185:106516.

566 63. Vecino E, Rodriguez FD, Ruzafa N, Pereiro X, Sharma SC. Glia–neuron interactions in the  
567 mammalian retina. *Prog. Retin. Eye Res.* 2016;51:1–40.

568

569

570 **Figure Legends**

571

572 **Figure 1. A:** Computation of LI for the GCL-IPL using the nasal (N) and temporal (T) sector GCL-  
573 IPL (GI) thickness values of both eyes, excluding superior (S) and inferior (I) sectors since they  
574 overlapped the vertical meridian. **B:** Plot comparing GCL-IPL thicknesses in the affected or  
575 unaffected hemiretinas (*paired t-test*,  $CI_{95} = 5.212$  to  $10.60$ ,  $t_{42} = 5.921$ ,  $p = <0.0001$ ). **C:** Plot of  
576  $LI_{GCL-IPL}$  against time since stroke (*linear regression*,  $R^2 = 0.2703$ ,  $CI_{95}(y\text{-intercept}) = 0.018$  to  $0.057$ ,  
577  $p = 0.0004$ ).

578

579 **Figure 2. A:** Computation of LI using RNFL thickness values (R) from superior (S) and inferior (I)  
580 peripapillary regions comprised of uncrossed fibers, and nasal (N) peripapillary regions  
581 comprised of crossed fibers representing intact or blind hemifields. **B:** Plot comparing affected  
582 peripapillary RNFL segments carrying RGC axons representing the visual field defect to  
583 unaffected carrying predominantly intact field fibers (*paired t-test*,  $CI_{95} = 1.046$  to  $5.450$ ,  $t_{42} =$   
584  $2.977$ ,  $p = 0.0048$ ). **C:** Plot of  $LI_{RNFL}$  against time since stroke (*linear regression*,  $R^2 = 0.2293$ ,  $CI_{95} =$   
585  $0.0004$  to  $0.0217$ ,  $p = 0.0012$ ).

586

587 **Figure 3. A:** Plot of pre- and post-training OU MD in BF-trained participants (*paired t-test*,  $CI_{95}$   
588  $= 0.098$  to  $1.2$ ,  $t_{18} = 2.473$ ,  $p = 0.023$ , *mean of differences* =  $0.65 \pm 1.15$ ). **B:** OU  $ST_{BF}$  pre- and post-  
589 training following BF training (*paired t-test*,  $CI_{95} = 0.177$  to  $2.258$ ,  $t_{18} = 2.458$ ,  $p = 0.024$ , *mean of*  
590 *differences* =  $1.22 \pm 2.16$ ). **C:** Linear regression of MD against  $ST_{BF}$  pre-training:  $R^2 = 0.9365$ ,  $CI_{95}(y\text{-}$   
591 *intercept*) =  $-18.28$  to  $-16.82$ ; post-BF training:  $p < 0.0001$ ;  $R^2 = 0.9526$ ,  $CI_{95}(y\text{-intercept}) = -18.21$  to -

592 16.84,  $p < 0.0001$ . **D:** Plot of pre- and post-training OU MD in IF-trained participants (*paired t-*  
593 *test*,  $CI_{95} = -0.3284$  to  $0.6284$ ,  $t_{18} = 0.6587$ ,  $p = 0.5184$ , *mean of differences* =  $1.5 \pm 0.9926$ ). **E:** OU  
594  $ST_{BF}$  pre- and post-training following IF training (*paired t-test*,  $CI_{95} = -0.1917$  to  $0.8655$ ,  $t_{18} =$   
595  $1.339$ ,  $p = 0.1972$ , *mean of differences* =  $0.3369 \pm 1.097$ ). **F:** Linear regression of MD against  $ST_{BF}$   
596 pre-training:  $R^2 = 0.963$ ,  $CI_{95}(y\text{-intercept}) = -17.04$  to  $-15.87$ ; post-IF training:  $p < 0.0001$ ;  $R^2 = 0.9481$ ,  
597  $CI_{95}(y\text{-intercept}) = -17.67$  to  $-16.08$ ,  $p < 0.0001$ ). ns: not statistically significant.

598

599 **Figure 4. A:** Plot of  $Ll_{GCL-IPL}$  pre- to post-training for all participants (*paired t-test*,  $CI_{95} = 0.005$  to  
600  $0.019$ ,  $t_{42} = 3.424$ ,  $p = 0.001$ ). **B:** Plot of  $Ll_{RNFL}$  pre- to post-training of all participants (*paired t-*  
601 *test*,  $CI_{95} = -0.0015$  to  $0.01251$ ,  $t_{42} = 1.572$ ,  $p = 0.1234$ ). ns: not statistically significant.

602

603 **Figure 5. A:** Plot of  $Ll_{GCL-IPL}$  pre- to post-training of participants who trained in their IF (*paired t-*  
604 *test*,  $CI_{95} = 0.003$  to  $0.025$ ,  $t_{22} = 2.837$ ,  $p = 0.0096$ ). **B:** Plot of  $Ll_{GCL-IPL}$  pre- to post-training of  
605 participants who trained in their BF (*paired t-test*,  $CI_{95} = -0.0008$  to  $0.0199$ ,  $t_{19} = 1.916$ ,  $p = 0.07$ ).  
606 **C:** Comparisons of unaffected and affected hemiretina GCL-IPL thicknesses, before and after  
607 training in the IF (*unaffected pre- vs post-training: paired t-test*,  $CI_{95} = -1.017$  to  $0.4516$ ,  $p =$   
608  $0.4332$ ; *affected pre- vs post-training: paired t-test*,  $CI_{95} = -3.233$  to  $-1.093$ ,  $p = 0.0004$ ). **D:**  
609 Comparison of unaffected and affected hemiretina GCL-IPL thicknesses, before and after BF  
610 training (*unaffected pre- vs post-training: paired t-test*,  $CI_{95} = -0.8943$  to  $0.4443$ ,  $p = 0.4902$ ;  
611 *affected pre- vs post-training: paired t-test*,  $CI_{95} = -2.691$  to  $-0.0843$ ,  $p = 0.04$ ). **E:** Comparison of  
612 change in GCL-IPL thickness from pre- to post-training in IF or BF-trained participants  
613 (*unaffected vs affected hemiretina in IF-trained subjects, paired t-test*,  $CI_{95} = 0.2063$  to  $3.555$ ,

614  $p=0.009$ ; unaffected vs affected hemiretina in BF-trained subjects,  $CI_{95}=-2.601$  to  $0.2762$ ,  
615  $p=0.1071$ ; unaffected vs unaffected of both training groups, unpaired t-test,  $CI_{95}=-0.9176$  to  
616  $1.033$ ,  $p=0.9056$ ; affected vs affected of both training groups, unpaired t-test,  $CI_{95}=-0.8438$  to  
617  $2.395$ ,  $p=0.3391$ ). A: Affected, UA: Unaffected, ns: not statistically significant.

618

619 **Figure 6. A:** Plot of  $LI_{RNFL}$  pre- to post-training of participants who trained in their IF (*paired t-*  
620 *test,  $CI_{95} = -0.003$  to  $0.0123$ ,  $t_{22} = 0.7322$ ,  $p = 0.4718$ ). B:* Plot of  $LI_{RNFL}$  pre- to post-training of  
621 participants who trained in their BF (*paired t-test,  $CI_{95} = -0.0036$  to  $0.0197$ ,  $t_{19} = 1.446$ ,  $p =$*   
622  *$0.1645$ ). C:* Comparison of unaffected and affected RNFL thicknesses, before and after IF  
623 training (*unaffected pre- vs post-training: paired t-test,  $CI_{95} = -1.860$  to  $0.8163$ ,  $p = 0.4274$ ;*  
624 *affected pre- vs post-training: paired t-test,  $CI_{95} = -2.796$  to  $0.7962$ ,  $p = 0.2606$ ). D:* Comparison  
625 of unaffected and affected RNFL thicknesses, before and after BF training (*unaffected pre- vs*  
626 *post-training: paired t-test,  $CI_{95} = -1.714$  to  $2.414$ ,  $p = 0.7266$ ; affected pre- vs post-training:*  
627 *paired t-test,  $CI_{95} = -2.862$  to  $0.3951$ ,  $p = 0.1294$ ). E:* Comparison of change in RNFL thickness  
628 from pre- to post-training in IF or BF-trained participants (*unaffected vs affected in IF-trained*  
629 *subjects: paired t-test,  $CI_{95} = -2.096$  to  $1.139$ ,  $p = 0.546$ ; unaffected vs affected in BF-trained*  
630 *subjects: paired t-test,  $CI_{95} = -3.627$  to  $0.4601$ ,  $p = 0.1213$ ; unaffected vs unaffected of both*  
631 *training groups: unpaired t-test,  $CI_{95} = -1.451$  to  $3.195$ ,  $p = 0.4529$ ; affected vs affected of both*  
632 *training groups: unpaired t-test,  $CI_{95} = -2.614$  to  $2.148$ ,  $p = 0.8441$ ). A: Affected, UA: Unaffected,*

633 ns: not statistically significant.  
634



635 **Figure 7. A:** Plot of change in  $ST_{BF}$  against  $Ll_{GCL-IPL}$  of participants trained in their IF (*linear*  
636 *regression,  $R^2=0.0307$ ,  $CI_{95}(y\text{-intercept})=-0.3997$  to  $0.8511$ ,  $p=0.4727$ ). **B:** Plot of changes in  $ST_{BF}$   
637 and  $Ll_{RNFL}$  in IF-trained participants (*linear regression,  $R^2=0.001$ ,  $CI_{95}(y\text{-intercept})=-0.3497$  to*  
638  *$0.766$ ,  $p=0.8857$ ). **C:** Plot of change in  $ST_{BF}$  against  $Ll_{GCL-IPL}$  of participants trained in their BF  
639 (*linear regression,  $R^2=0.2170$ ,  $CI_{95}(y\text{-intercept})=0.6239$  to  $2.723$ ,  $p=0.04$ ). **D:** Plot of changes in  
640  $ST_{BF}$  and  $Ll_{RNFL}$  in participants training in the BF (*linear regression,  $R^2=0.0196$ ,  $CI_{95}(y\text{-$   
641 *intercept})=0.0093 to  $2.241$ ,  $p=0.5674$ ).*****

642

643

644 **Table 1. Participant demographics.** m: male, f: female, R: right, L: left.

| Subject code | Sex | Age range (years) | Time since stroke (months) | Affected visual hemifield | Training Group |
|--------------|-----|-------------------|----------------------------|---------------------------|----------------|
| CB1          | m   | 46-50             | 32                         | R                         | Intact         |
| CB2          | f   | 46-50             | 13                         | R                         | Intact         |
| CB3          | m   | 70-75             | 20                         | L                         | Intact         |
| CB4          | m   | 60-65             | 61                         | L                         | Intact         |
| CB5          | m   | 60-65             | 43                         | L                         | Intact         |
| CB6          | m   | 55-60             | 105                        | R                         | Intact         |
| CB7          | f   | 70-75             | 338                        | L                         | Intact         |
| CB8          | m   | 70-75             | 10                         | L                         | Intact         |
| CB9          | m   | 66-70             | 6                          | R                         | Intact         |
| CB10         | m   | 70-75             | 4                          | L                         | Intact         |
| CB11         | m   | 70-75             | 58                         | L                         | Intact         |
| CB12         | f   | 66-70             | 16                         | R                         | Intact         |
| CB13         | f   | 50-55             | 24                         | L                         | Intact         |
| CB14         | m   | 60-65             | 130                        | L                         | Intact         |
| CB15         | m   | 56-60             | 13                         | L                         | Intact         |
| CB16         | m   | 46-50             | 63                         | L                         | Intact         |
| CB17         | m   | 60-65             | 8                          | L                         | Intact         |
| CB18         | f   | 46-50             | 15                         | R                         | Intact         |
| CB19         | m   | 60-65             | 20                         | R                         | Intact         |
| CB20         | m   | 40-45             | 5                          | R                         | Intact         |
| CB21         | m   | 66-70             | 3                          | R                         | Intact         |
| CB22         | m   | 56-60             | 4                          | R                         | Intact         |
| CB23         | m   | 70-75             | 6                          | L                         | Intact         |
| CB24         | m   | 66-70             | 60                         | L                         | Blind          |
| CB25         | f   | 50-55             | 38                         | R                         | Blind          |
| CB26         | f   | 50-55             | 18                         | L                         | Blind          |
| CB27         | m   | 40-45             | 15                         | R                         | Blind          |
| CB28         | m   | 50-55             | 373                        | R                         | Blind          |
| CB29         | m   | 60-65             | 5                          | R                         | Blind          |
| CB30         | m   | 70-75             | 47                         | R                         | Blind          |
| CB31         | m   | 56-60             | 8                          | L                         | Blind          |
| CB32         | m   | 60-65             | 47                         | L                         | Blind          |
| CB33         | m   | 40-45             | 11                         | R                         | Blind          |
| CB34         | m   | 56-60             | 4                          | L                         | Blind          |
| CB35         | f   | 40-45             | 10                         | R                         | Blind          |
| CB36         | m   | 66-70             | 105                        | L                         | Blind          |
| CB37         | m   | 66-70             | 36                         | R                         | Blind          |
| CB38         | m   | 30-35             | 5                          | R                         | Blind          |
| CB39         | f   | 46-50             | 5                          | L                         | Blind          |
| CB40         | f   | 60-65             | 3                          | L                         | Blind          |
| CB41         | m   | 46-50             | 14                         | R                         | Blind          |
| CB42         | m   | 66-70             | 3                          | L                         | Blind          |
| CB43         | m   | 70-75             | 6                          | L                         | Blind          |

645

646

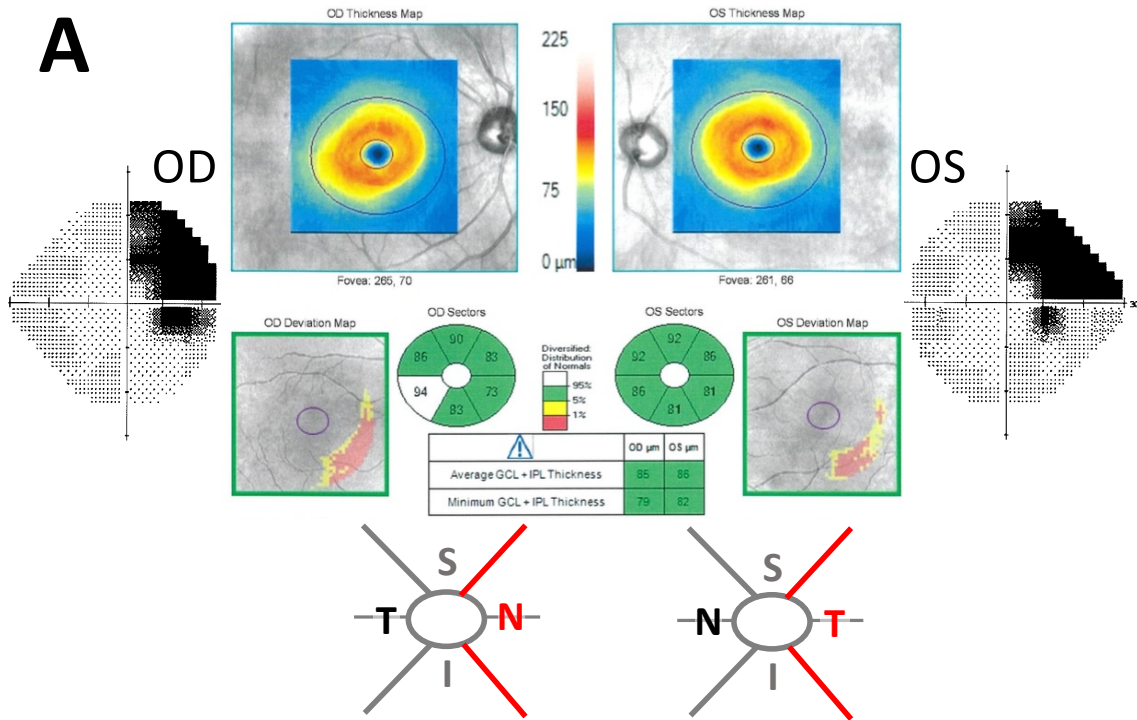

$$LI_{\text{GCL-IPL}} = \frac{[(GI_{\text{T\_OD}} + GI_{\text{N\_OS}})/2] - [(GI_{\text{N\_OD}} + GI_{\text{T\_OS}})/2]}{[(GI_{\text{T\_OD}} + GI_{\text{N\_OS}})/2] + [(GI_{\text{N\_OD}} + GI_{\text{T\_OS}})/2]}$$

(Right deficit)

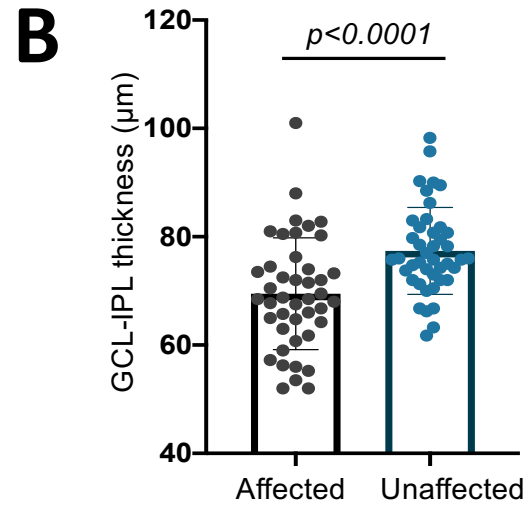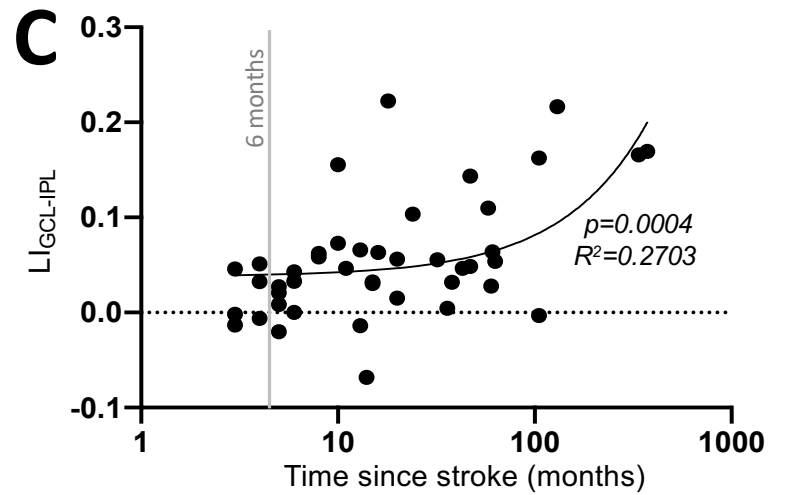

Figure 2

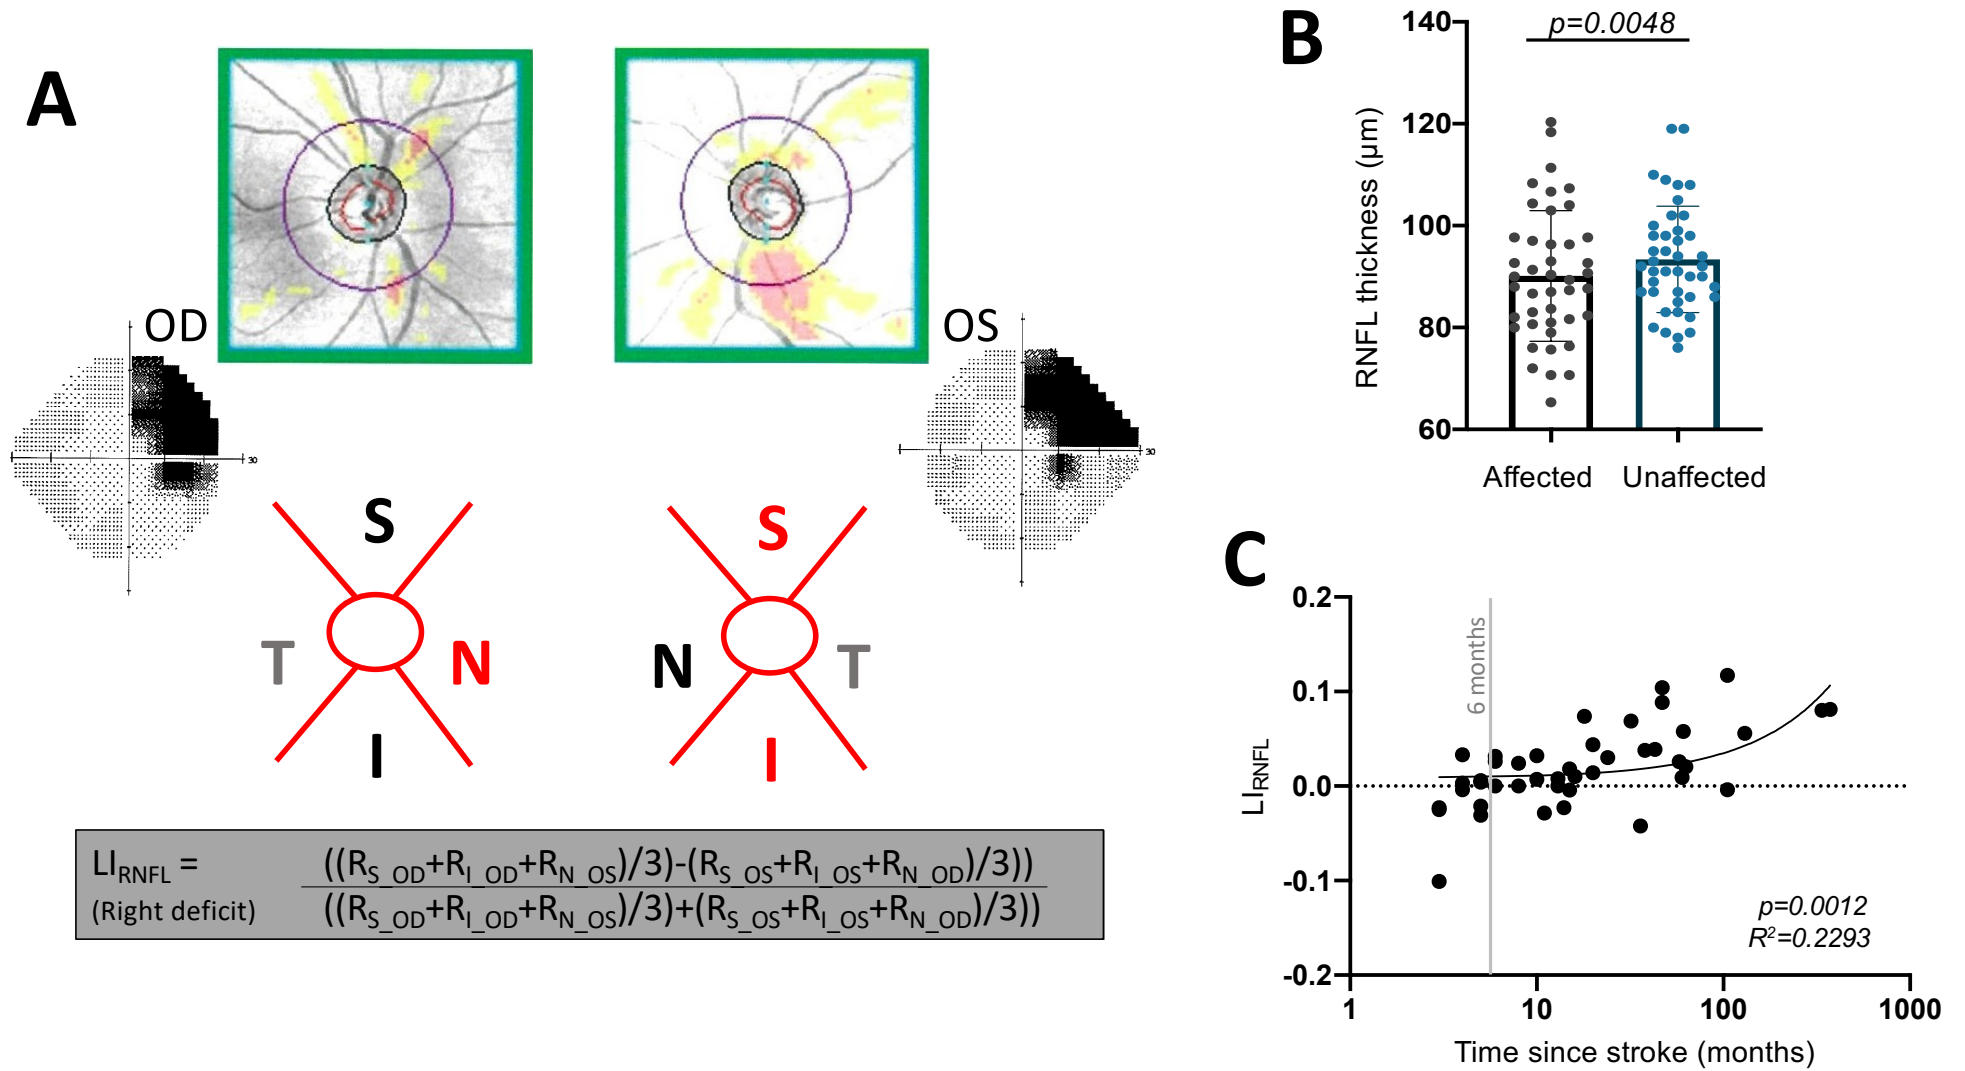

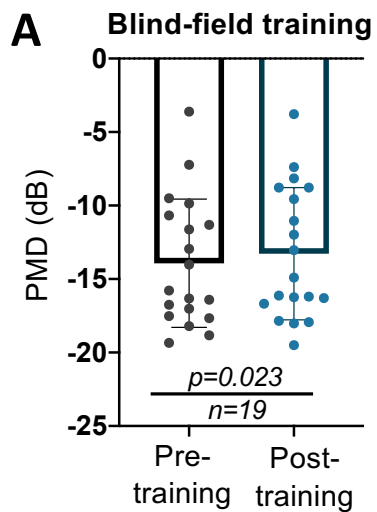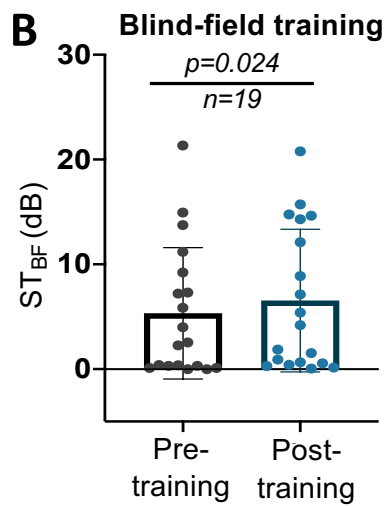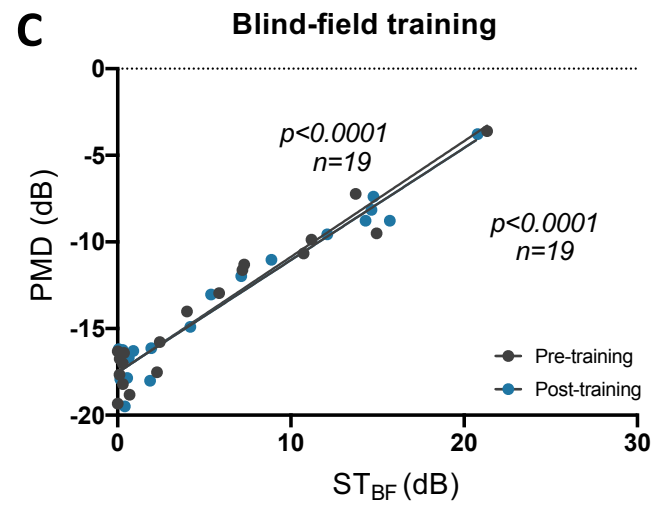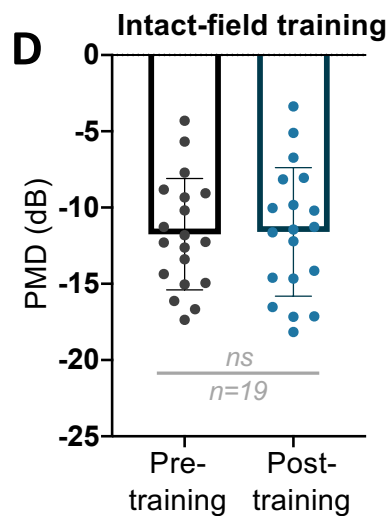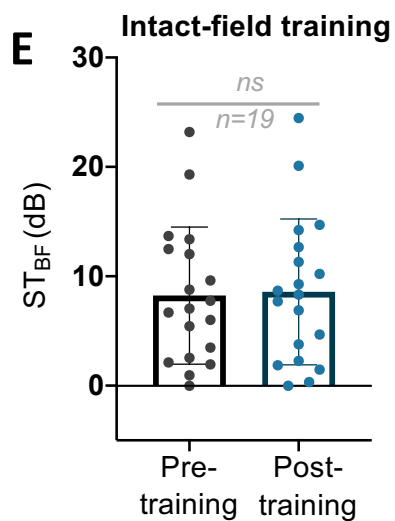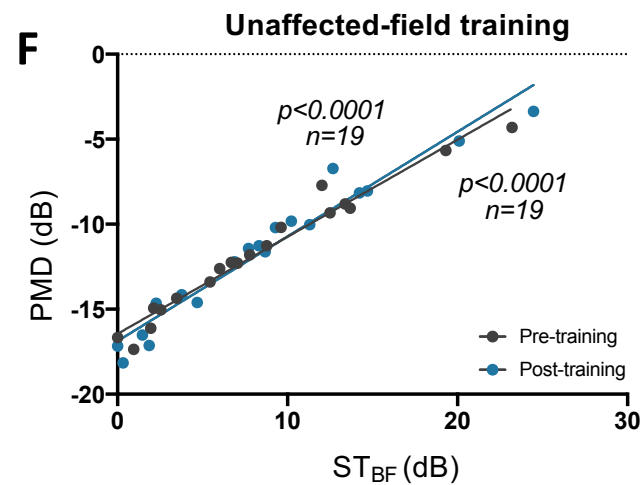

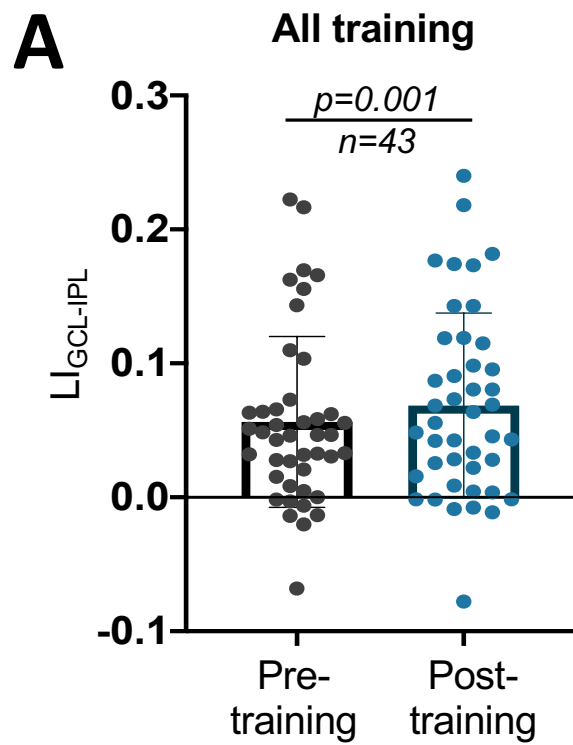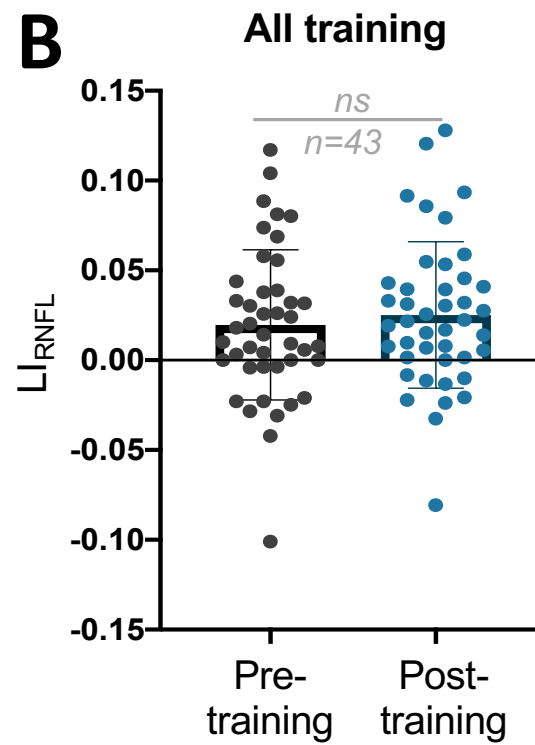

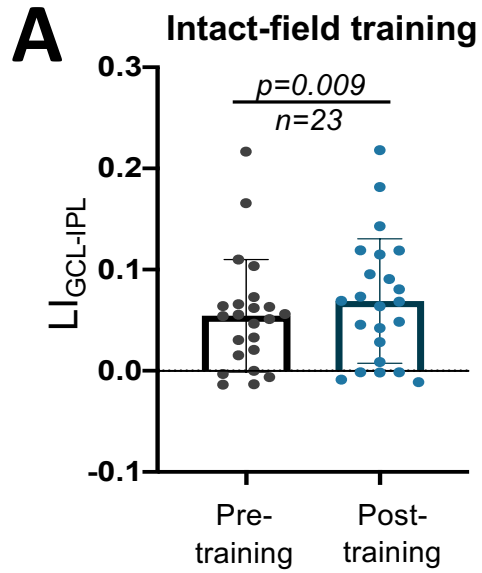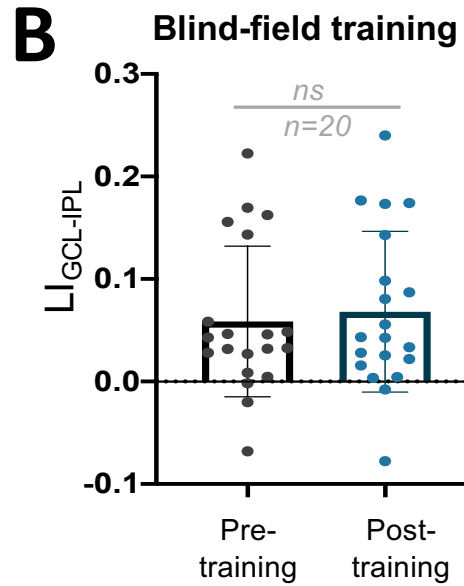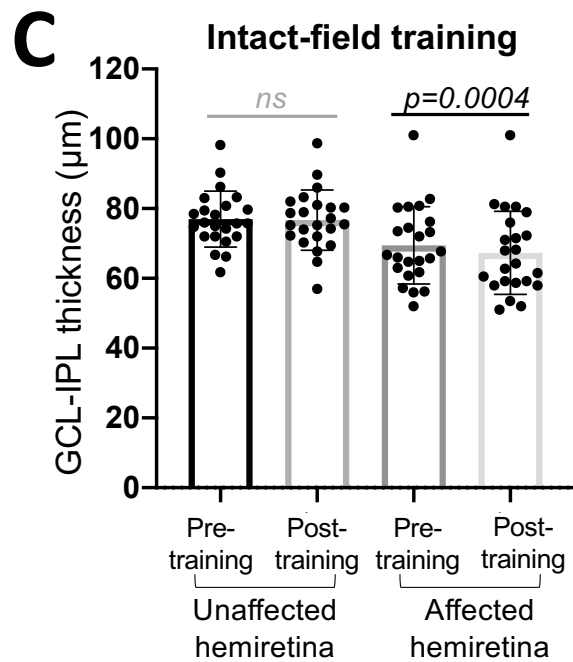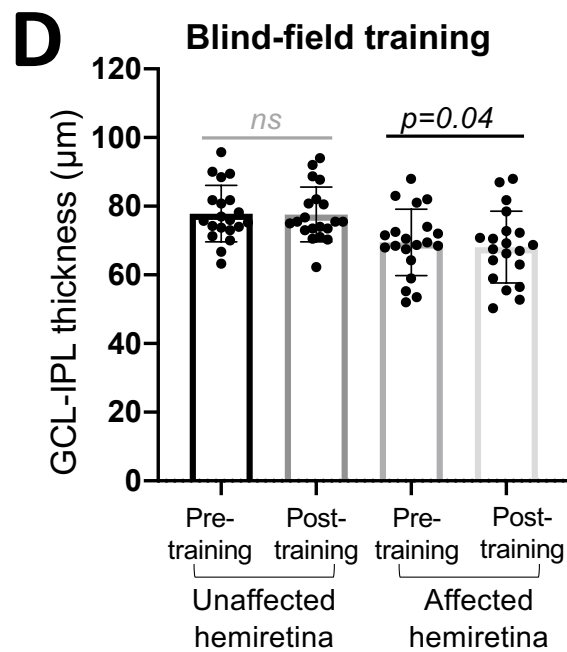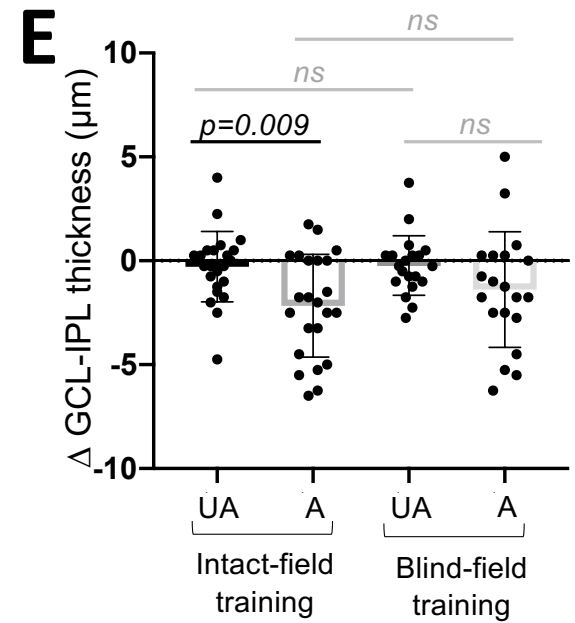

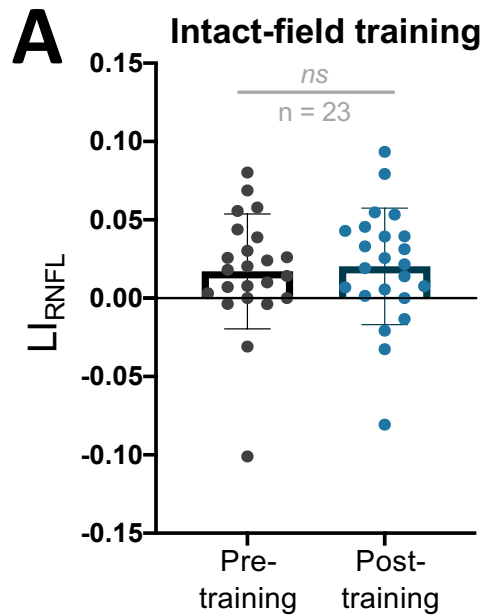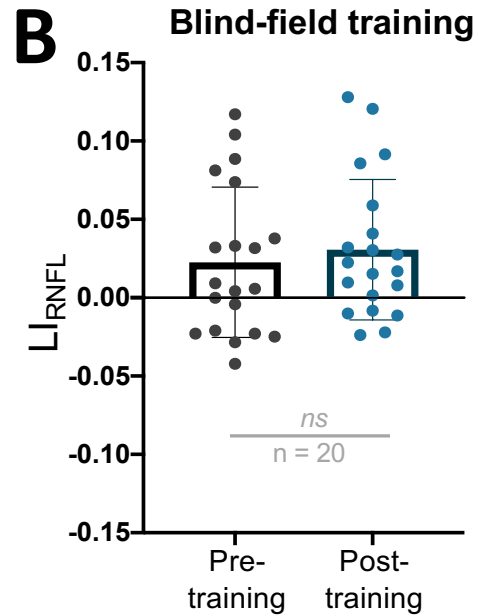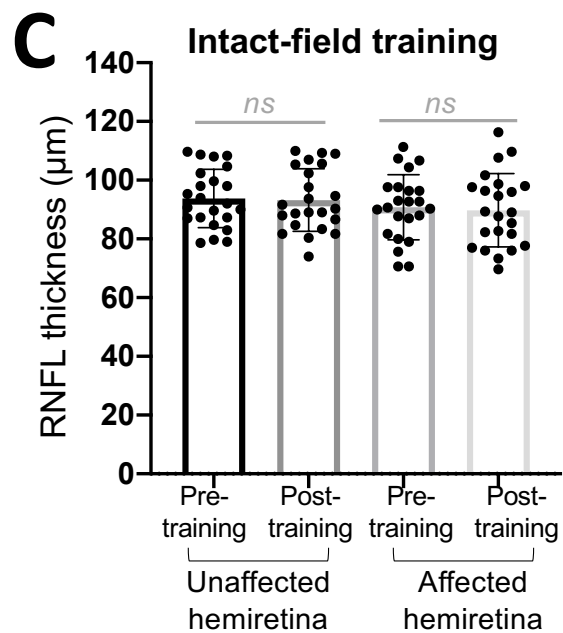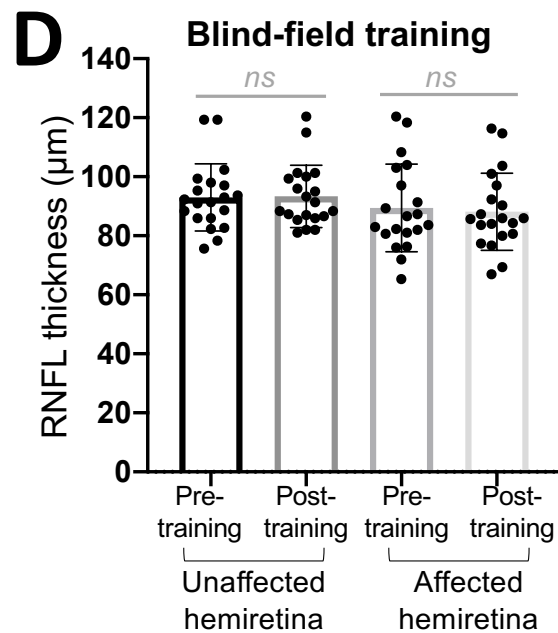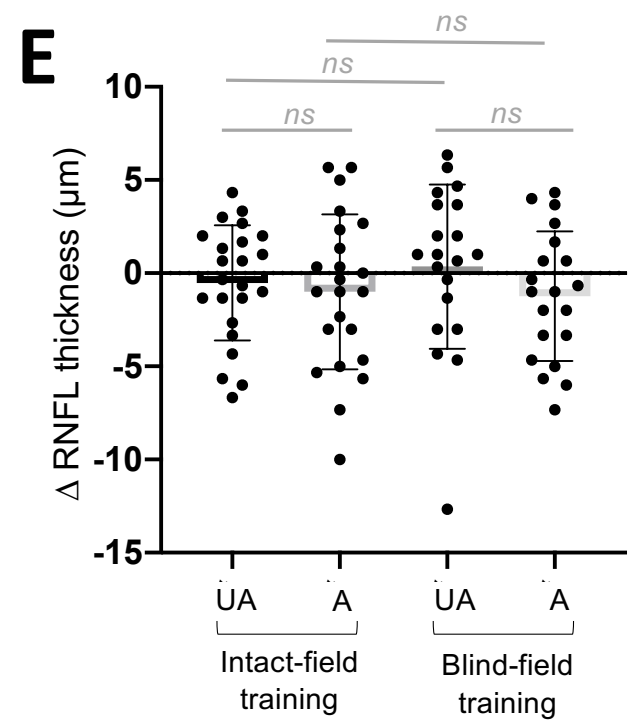



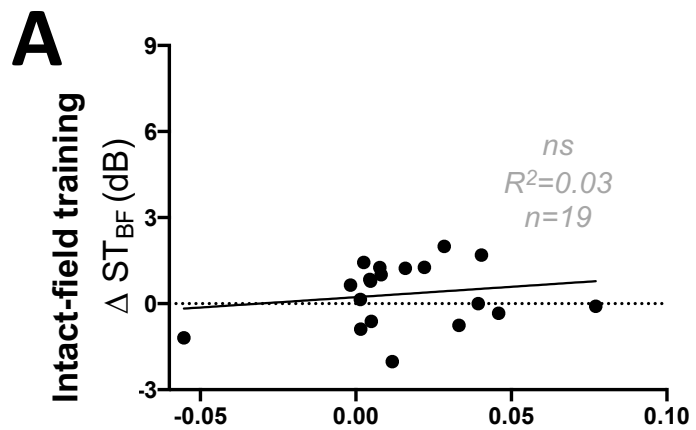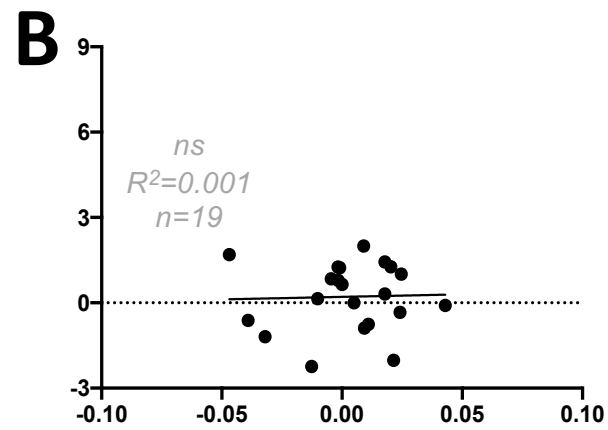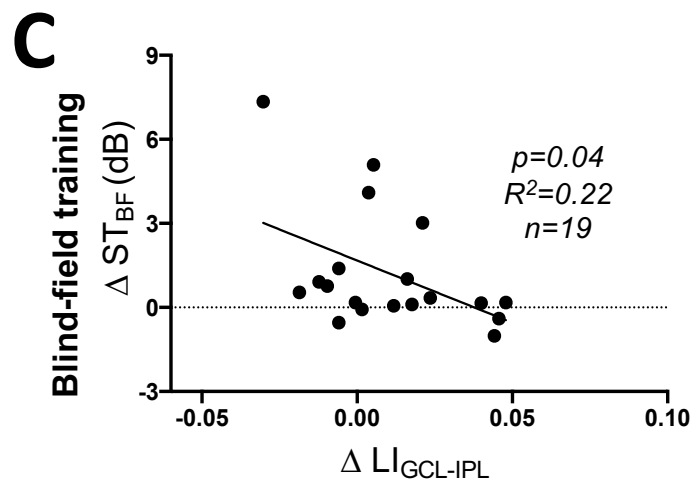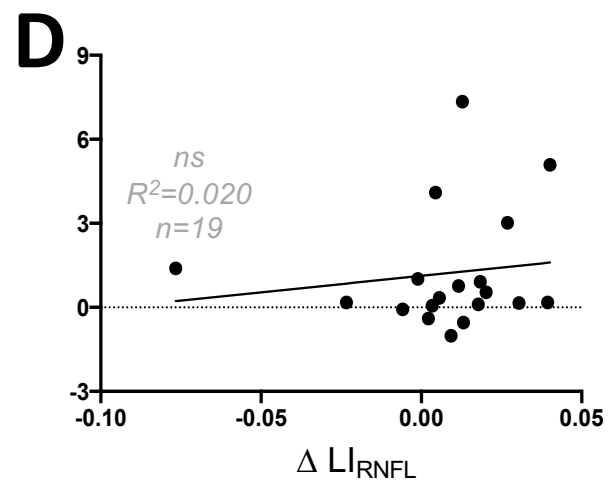

Source: https://www.medrxiv.org/content/10.1101/2023.12.19.23298260v1.full.pdf
